# Supplementary material
Source: PubMed Central journal article supplement (PMC5007081)
Supplement: NIHMS809655-supplement-Supp_info.pdf [file NIHMS809655-supplement-Supp_info.pdf]

## Supporting Information (SI)

### A Spectrum of CodY Activities Drives Metabolic Reorganization and Virulence Gene Expression in *Staphylococcus aureus*

Nicholas R. Waters, David J. Samuels, Ranjan K. Behera, Jonathan Livny, Kyu Y. Rhee, Marat R. Sadykov, and Shaun R. Brinsmade\*

**Table S1. Additional strains and plasmids.**

| Strain or plasmid     | Genotype                                                                                                                                             | Source or Reference <sup>a</sup>   |
|-----------------------|------------------------------------------------------------------------------------------------------------------------------------------------------|------------------------------------|
| <b><i>E. coli</i></b> |                                                                                                                                                      |                                    |
| NEB 5 $\alpha$        | <i>fhuA2</i> $\Delta$ ( <i>argF-lacZ</i> )U169 <i>phoA glnV44</i> $\Phi$ 80 $\Delta$ ( <i>lacZ</i> )M15 <i>gyrA96 recA1 relA1 endA1 thi-1 hsdR17</i> | New England Biolabs                |
| <b>Plasmids</b>       |                                                                                                                                                      |                                    |
| pMAD                  | Gram-positive allelic exchange vector, Ap <sup>R</sup> Em <sup>R</sup>                                                                               | (Arnaud <i>et al.</i> , 2004)      |
| pCN38                 | Source of <i>cat194</i> cassette                                                                                                                     | (Charpentier <i>et al.</i> , 2004) |
| pMRSI                 | sGFP-sDsRed double reporter shuttle vector, Ap <sup>R</sup> Cm <sup>R</sup>                                                                          |                                    |
| pMRSI-nuc             | pMRSI with <i>nuc-gfp</i> reporter, Ap <sup>R</sup> Cm <sup>R</sup>                                                                                  |                                    |
| pSRB44                | pMAD with <i>sucD::cat194</i> allele, Ap <sup>R</sup> Em <sup>R</sup> Cm <sup>R</sup>                                                                |                                    |
| pSRB57                | pMAD mutated <i>codY</i> fragment to generate <i>codY57</i> , Ap <sup>R</sup> Em <sup>R</sup>                                                        |                                    |
| pSRB58                | pMAD mutated <i>codY</i> fragment to generate <i>codY58</i> , Ap <sup>R</sup> Em <sup>R</sup>                                                        |                                    |
| pSRB65                | pMAD with in-frame deletion fragment to generate $\Delta$ <i>ilvE1</i> , Ap <sup>R</sup> Em <sup>R</sup>                                             |                                    |
| pSRB66                | pMAD mutated <i>codY</i> fragment to generate <i>codY66</i> , Ap <sup>R</sup> Em <sup>R</sup>                                                        |                                    |
| pTET                  | pTnT with <i>tet(M)</i>                                                                                                                              | (Bose <i>et al.</i> , 2013)        |

<sup>a</sup>Unless otherwise noted, strains and plasmids were constructed during the course of this study.

**Table S2. Oligonucleotides used in this study.**

| Oligo       | Sequence (5' → 3')                                                         | Purpose                     | Source or reference <sup>a</sup> |
|-------------|----------------------------------------------------------------------------|-----------------------------|----------------------------------|
| KPPE-TIR-f  | GGTACCAGCTGCAGAATTCTGATTAAC TTTATAAGGAG<br>GAAAAACATATGC                   | pMRSI construction          |                                  |
| NNSB-TIR*-r | GCCGGCTAGCACTAGTGGATCCAGATAATCTATAAAAG<br>GAGG                             | pMRSI construction          |                                  |
| oSRB198     | TGG AGG TAG AAT TCA AGC AGG CGG AGT                                        | <i>sucD</i> deletion allele |                                  |
| oSRB199     | TTT CCT AGG CAT CTT AGT GCT CCC ATC CTT T                                  | <i>sucD</i> deletion allele |                                  |
| oSRB200     | GCA CTA AGA TGC CTA GGA AAA AAC TCG AGT AAA<br>GTT AAA AGA TGA TAT AA      | <i>sucD</i> deletion allele |                                  |
| oSRB201     | ATA AAG ATG GAT CCA ATA TAC ATT AAC                                        | <i>sucD</i> deletion allele |                                  |
| oSRB233     | AGG ATC GAG TCT AAA TGA ATT ATT AAA AAG TCA<br>AGA AAT TAT TCA AAT GT      | R61E allele                 |                                  |
| oSRB234     | ACA TTT GAA TAA TTT CTT GAC TTT TTA AT                                     | R61E allele                 |                                  |
| oSRB235     | AGG ATC GAG TCT AAA TGA ATT ATT AAA AAG TCA<br>AAA AAT TAT TCA AAT GT      | R61K allele                 |                                  |
| oSRB236     | ACA TTT GAA TAA TTT TTT GAC TTT TTA AT                                     | R61K allele                 |                                  |
| oSRB237     | AGG ATC GAG TCT AAA TGA ATT ATT AAA AAG TCA<br>ACA TAT TAT TCA AAT GT      | R61H allele                 |                                  |
| oSRB238     | ACA TTT GAA TAA TAT GTT GAC TTT TTA AT                                     | R61H allele                 |                                  |
| oSRB248     | TTT CAT TCC TAT GGA TCC TGA TTC AAT T                                      | <i>codY</i> cloning flank   |                                  |
| oSRB249     | ACG AAA GTT GCC ATG GAT TAA ACA ATA TGA A                                  | <i>codY</i> cloning flank   |                                  |
| oSRB316     | GAA ACA AGG ATC CGT TAT AAT TTA                                            | <i>ilvE</i> deletion allele |                                  |
| oSRB317     | CAT GGT GAT TGC CTC CTA ATA ATA                                            | <i>ilvE</i> deletion allele |                                  |
| oSRB318     | TAT TAT TAG GAG GCA ATC ACC ATG CCC GGG TAA<br>TAA AAA TTG AAT ATG ATC ATG | <i>ilvE</i> deletion allele |                                  |
| oSRB319     | TAA CAC CGT CGA CCC AAT TAA TTT                                            | <i>ilvE</i> deletion allele |                                  |
| oSRB320     | TCTATAAAAATATACAAAAGGAGA                                                   | <i>codY</i> sequencing      |                                  |
| oSRB321     | GTTACGACTAGGACATTGAATTAT                                                   | <i>codY</i> sequencing      |                                  |
| oSRB451     | ATC GTG TAC TCG ATC AAG TAC TAA TGT                                        | G129D allele                |                                  |
| oSRB452     | ACA TTA GTA CTT GAT CGA GTA CAC GAT                                        | G129D allele                |                                  |
| oSRB453     | TAC AAA TAT TGG ATC CTT TAC ACA ATC A                                      | G129D allele                |                                  |

|                          |                                                      |                           |                                   |
|--------------------------|------------------------------------------------------|---------------------------|-----------------------------------|
| pCN51-S1-f               | CTCACATGTTCTTTCCTGCGTTATCC                           | pMRSI sequencing          |                                   |
| pCN51-S-r                | GTTCTTGTTGCTGTTTCCTGTTCTG                            | pMRSI sequencing          |                                   |
| Pnuc1-r1                 | GGGCATAACTAACACCTCTTTCTTTTTAGTTAATTTTAA<br>TATTAAACG | pMRSI-nuc<br>construction |                                   |
| sDsRed-S-r               | CTGTTGATGGTTCCCAACCC                                 | pMRSI sequencing          |                                   |
| sGFP-S-r                 | GTAGCATCACCTTCACCCTCTC                               | pMRSI sequencing          |                                   |
| SphI-Pnuc-f              | CATAGCATGCGTGAATAATAAGATAGAGAAAACCTGAAA<br>AACGC     | pMRSI-nuc<br>construction |                                   |
| <b>Nuc<br/>substrate</b> | Cy3—CCCCGGATCCACCCC—BHQ2                             | FRET assay                | (Kiedrowski <i>et al.</i> , 2011) |

Quantitative, real-time RT-PCR oligos

| Oligo   | Sequence (5' → 3')                | Specificity  |
|---------|-----------------------------------|--------------|
| oDS001  | CGA AAG AAC AAT ACG CAA AGA GG    | <i>nuc</i>   |
| oDS002  | TGC ATT TGC TGA GCT ACT TAG A     | <i>nuc</i>   |
| oNSF1   | CAG GTG ACA CAG CGG GTA TT        | <i>polC</i>  |
| oNSR1   | TGC CGG GTT GTG ATG CTA TT        | <i>polC</i>  |
| oNW043  | TGA ACA AGA AGC CTG ACA TAA A     | <i>icaA</i>  |
| oNW044  | CGT ATT TGA GTG CAA GAA CAT TAG   | <i>icaA</i>  |
| oSRB239 | GGA TTG GCT TCA CCT GAA AA        | <i>rpoC</i>  |
| oSRB240 | CTT TCA CGA CGT ACT TTA GA        | <i>rpoC</i>  |
| oSRB241 | AAG GAG ATC ACC AAG CAC CA        | <i>ilvD</i>  |
| oSRB242 | CTG CAA GCT CTC TTA AAT GA        | <i>ilvD</i>  |
| oSRB243 | AAC ATA AAT TGG GAG CAG CA        | <i>fnbA</i>  |
| oSRB244 | TTG TCT TTT GTT CTG ATG CT        | <i>fnbA</i>  |
| oSRB356 | GTG AAT TTG TTC ACT GTG TCG ATA A | <i>hld</i>   |
| oSRB357 | GGA GTG ATT TCA ATG GCA CAA G     | <i>hld</i>   |
| oSRB454 | GGT GTT GAA AGT GTA GGC AAT C     | <i>brnQ2</i> |
| oSRB455 | AGC ACG TGG AAT ACC GTA AA        | <i>brnQ2</i> |

<sup>a</sup>Unless noted, oligos are from this study.

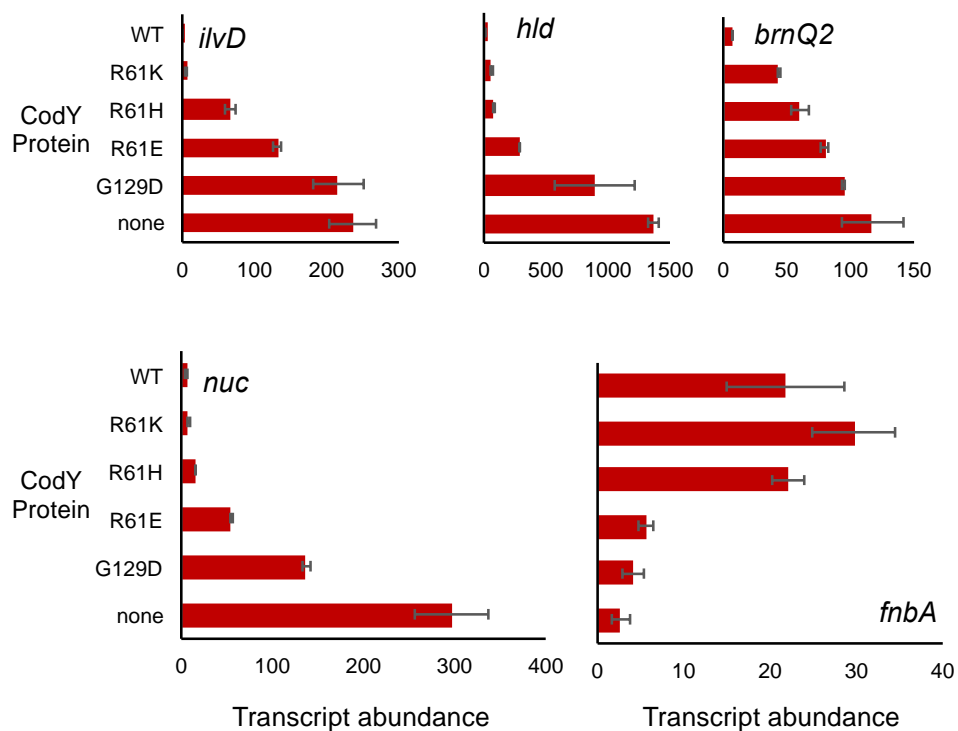

**Figure S1: CodY proteins retain varying amounts of residual regulatory activity.** Strains producing variant proteins were cultivated in TSB. qRT-PCR was performed on cDNA versions of RNA extracted from cells collected during exponential growth when CodY activity is maximized. In all cases, copies of target transcript were normalized to copies of *rpoC* transcript whose expression is stable (mean transcript abundance) and plotted. Error bars denote standard error of the mean of at least two independent experiments, each performed in technical triplicate.

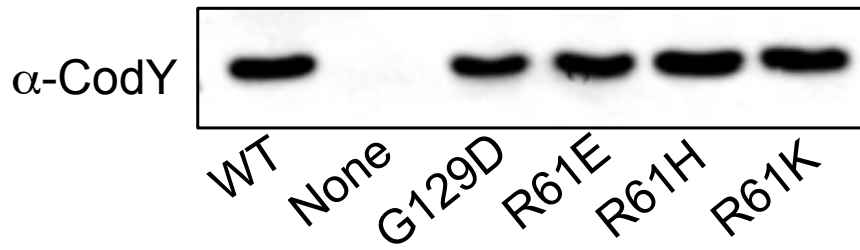

**Figure S2: Variant CodY proteins achieve similar abundances during in vitro growth.** Soluble protein extracts were prepared from exponentially growing *S. aureus* cells in TSB at 37°C as described in *Experimental Procedures*. An equal amount of each protein sample was separated using SDS-PAGE, transferred to nitrocellulose and analyzed by Western Blot with anti-CodY antibody raised against *Bacillus subtilis* CodY protein.

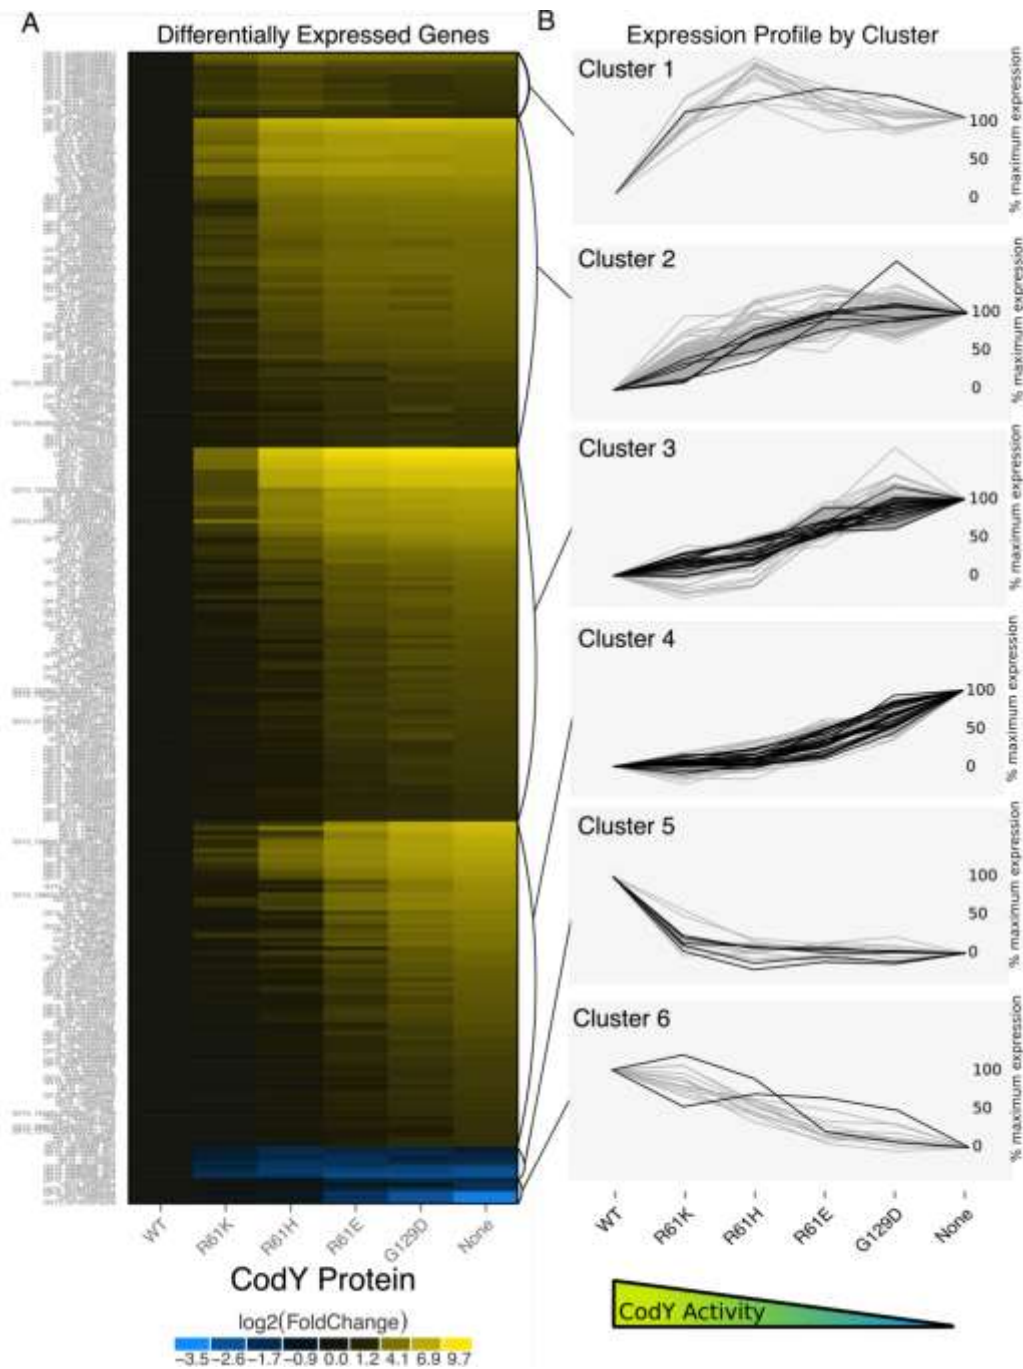

**Figure S3: Graded CodY activity turns genes on and off sequentially. A.** Heatmap of differentially expressed genes. Fold-changes are color-coded, with yellow indicating an increase in expression and blue indicating a decrease in expression relative to UAMS-1 (wild-type, WT) on a log(2) scale. **B.** *k*-means clustering of genes based on relative expression. Repressed genes were set to 100% in the *codY* null mutant, stimulated genes were set to 100% in UAMS-1 (wild-type, WT). Grey lines denote metabolism genes, black lines denote virulence genes. The plots do not imply a linear relationship between the strains.

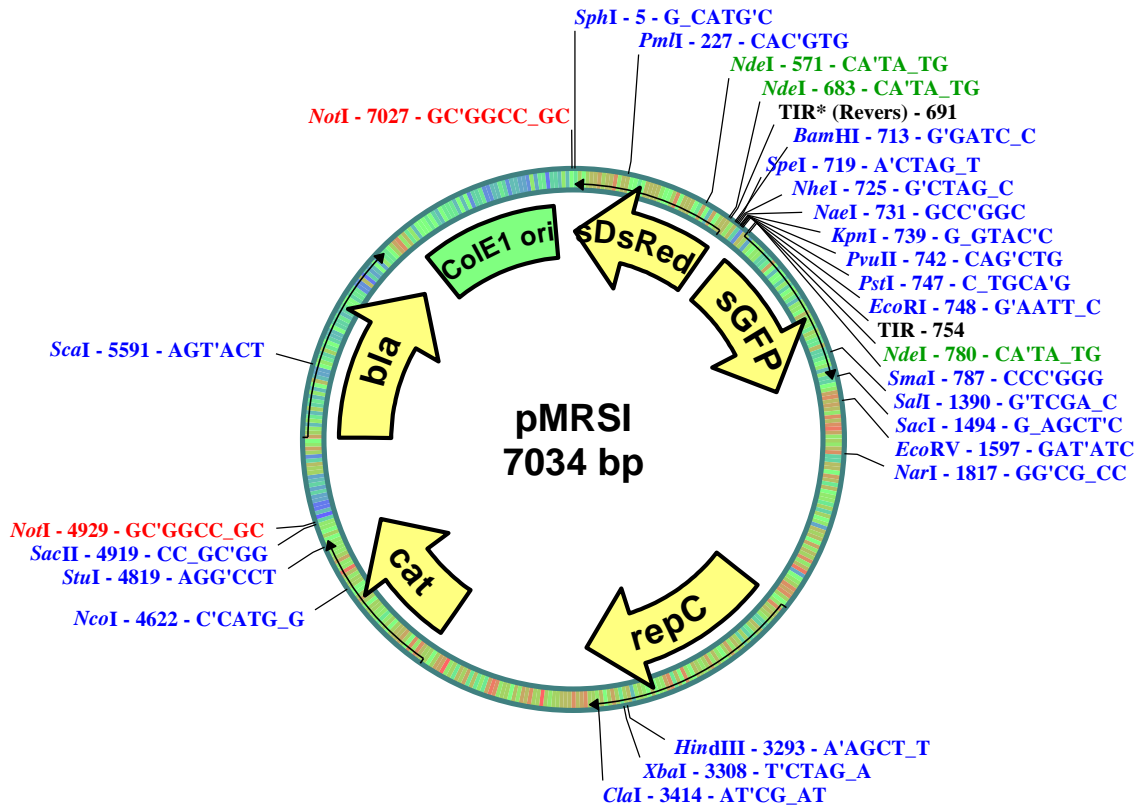

**Figure S4: Map of the pMRSI double reporter shuttle vector used in this study.** Optimized translation initiation regions (TIR – TGATTAAC TTTATAAGGAGGAAAAA and TIR\* – AGATAATCTATAAAAGGAGGAA) are indicated upstream of the sGFP and sDsRed genes correspondingly. Unique recognition sequences for the Type II restriction endonucleases are indicated in blue. The pMRSI map was generated using pDRAW32 (AcaClone Software [<http://www.acaclone.com>]).

## References

- Arnaud, M., A. Chastanet & M. Débarbouillé, (2004) New vector for efficient allelic replacement in naturally nontransformable, low-GC-content, gram-positive bacteria. *Appl. Environ. Microbiol.* **70**: 6887-6891.
- Bose, J.L., P.D. Fey & K.W. Bayles, (2013) Genetic tools to enhance the study of gene function and regulation in *Staphylococcus aureus*. *Appl Environ Microbiol* **79**: 2218-2224.
- Charpentier, E., A.I. Anton, P. Barry, B. Alfonso, Y. Fang & R.P. Novick, (2004) Novel cassette-based shuttle vector system for gram-positive bacteria. *Appl Environ Microbiol.* **70**: 6076-6085.
- Kiedrowski, M., J. Kavanaugh, C. Malone, J. Mootz, J. Voyich, M. Smeltzer, K. Bayles & H. AR, (2011) Nuclease modulates biofilm formation in community-associated methicillin-resistant *Staphylococcus aureus*. *PLoS One.* **6**: e26714.
